# Supplementary material for: Design and development of a mobile-based self-care application for patients with depression and anxiety disorders
Source: BMC Med Inform Decis Mak. 2023 Oct 2;23:199. doi: 10.1186/s12911-023-02308-y (PMC10544565; doi:10.1186/s12911-023-02308-y)
Supplement: Supplementary file 1 — Supplementary Material 1 [file 12911_2023_2308_MOESM1_ESM.docx]

**Identify the capabilities and education- information needs to design and development a mobile-based self-care application for patient with depression and anxiety disorders**

**Section A:** Demographic and clinical characteristics

1. What is your education level?

- Men
- Women

1. What is your age in years?

- 31-30
- 31-40
- >=41

1. What is your education level?

- Diploma
- Bachelor
- Master
- PhD

1. What is your type of disorder?

- Depression
- Anxiety
- Depression and Anxiety

**Section B:** Information-educational needs and capabilities for application design and development

| **Category** | **Education-informational needs and capabilities** | **Completely unnecessary** | **Unnecessary** | **Neutral** | **Necessary** | **Completely necessary** |
| --- | --- | --- | --- | --- | --- | --- |
| **User profile** | First name & last name |  |  |  |  |  |
| National code |  |  |  |  |  |
| Age |  |  |  |  |  |
| Weight |  |  |  |  |  |
| Height |  |  |  |  |  |
| Education level |  |  |  |  |  |
| Address |  |  |  |  |  |
| Contact number |  |  |  |  |  |
| **Clinical history** | Underlying disease |  |  |  |  |  |
| Family history of mental disorder and type of disorder |  |  |  |  |  |
| Duration of the disorder |  |  |  |  |  |
| Suicide history |  |  |  |  |  |
| Blood group |  |  |  |  |  |
| Hospital history |  |  |  |  |  |
| The first hospitalization |  |  |  |  |  |
| Number of hospitalization |  |  |  |  |  |
| History of smoking and alcohol |  |  |  |  |  |
| **life style** | Sport |  |  |  |  |  |
| Sleep management |  |  |  |  |  |
| Nutrition |  |  |  |  |  |
| Proper weight |  |  |  |  |  |
| Smoking and drinking alcohol |  |  |  |  |  |
| Stress and anxiety Management |  |  |  |  |  |
| Existence of bad habits |  |  |  |  |  |
| Overcoming to wrong beliefs |  |  |  |  |  |
| Overcome to failures |  |  |  |  |  |
| Personal hygiene |  |  |  |  |  |
| Physical activity |  |  |  |  |  |
| Strengthen the mind and body |  |  |  |  |  |
| Healthy sex |  |  |  |  |  |
| Social support and healthy relationships |  |  |  |  |  |
| **Disease management and control** | Introduction of anxiety and depression disorders |  |  |  |  |  |
| Symptoms of anxiety and depression disorders |  |  |  |  |  |
| Complications of anxiety and depression disorders |  |  |  |  |  |
| Deep relaxation exercises |  |  |  |  |  |
| Prevent the aggravation of the effects of anxiety and depression disorders |  |  |  |  |  |
| Overcoming stress and negative thoughts |  |  |  |  |  |
| Being Optimistic |  |  |  |  |  |
| Anger management |  |  |  |  |  |
| Dealing with worry |  |  |  |  |  |
| Manage conflict at work, school or in relationships |  |  |  |  |  |
| Smoking and drinking alcohol |  |  |  |  |  |
| Drug Use and Addiction |  |  |  |  |  |
| Proper communication with others |  |  |  |  |  |
| Anxiety and nervous attacks |  |  |  |  |  |
| How to get away from stressful relationships and environments |  |  |  |  |  |
| Health nutrition and diet |  |  |  |  |  |
| How to maintain mental health |  |  |  |  |  |
| Increasing the self confidence |  |  |  |  |  |
| Easing fear |  |  |  |  |  |
| High focus |  |  |  |  |  |
| Positive communication and social interactions |  |  |  |  |  |
| Make a better sense on yourself |  |  |  |  |  |
| Motivation for more activity |  |  |  |  |  |
| Reduce restlessness |  |  |  |  |  |
| Self-care |  |  |  |  |  |
| Hopeful sentences |  |  |  |  |  |
| Daily programming |  |  |  |  |  |
| **Relaxation instructions** | Slowly and regularly breathe |  |  |  |  |  |
| Strengthen muscles |  |  |  |  |  |
| Prayer |  |  |  |  |  |
| Music therapy |  |  |  |  |  |
| Aromatherapy |  |  |  |  |  |
| Mental imagery |  |  |  |  |  |
| Mindfulness |  |  |  |  |  |
| Meditation |  |  |  |  |  |
| Walking with mindfulness or yoga |  |  |  |  |  |
| Repeat soothing words |  |  |  |  |  |
| **Application capabilities** | Calculate BMI |  |  |  |  |  |
| Lectures |  |  |  |  |  |
| Provide clinical history |  |  |  |  |  |
| Introducing counseling centers to receive health services |  |  |  |  |  |
| Management of medications |  |  |  |  |  |
| Management of Nutrition and diet |  |  |  |  |  |
| Notebook |  |  |  |  |  |
| Communication with doctors, consultants and other patients |  |  |  |  |  |
| Appointment reminder |  |  |  |  |  |
| Relaxing music |  |  |  |  |  |
| Games and intellectual puzzles |  |  |  |  |  |
| Application settings (such as font, size and color of content) |  |  |  |  |  |
